# Supplementary material for: Predictive value of the five-repetition sit-to-stand test for outcomes after surgery for lumbar disc herniation: prospective study
Source: Springer Nature journal article supplement (doi:10.1007/s00586-023-08046-z), 2023-11-22
Supplement: MOESM1 [file 26344304]

#R Script

#Reformat variables

df$ofi1 <- factor(df$ofi1)

df$ofi12 <- factor(df$ofi12)

df$ofibss1 <- factor(df$ofibss1)

df$ofibss12 <- factor(df$ofibss12)

df$level <- factor(df$level)

df$hernia <- factor(df$hernia)

df$historyofpain <- factor(df$historyofpain)

df$previoussurgery <- factor(df$previoussurgery)

df$sex <- factor(df$sex)

df$education <- factor(df$education)

df$worksituation <- factor(df$worksituation)

df$analgesia <- factor(df$analgesia)

df$smokingstatus <- factor(df$smokingstatus)

df$workability1 <- factor(df$workability1)

df$workability6 <- factor(df$workability6)

df$workability12 <- factor(df$workability12)

df$satisfied <- factor(df$satisfied)

df$mood1 <- factor(df$mood1)

df$mood6 <- factor(df$mood6)

df$mood12 <- factor(df$mood12)

df$moodchange <- df$moodchange

df$EQ5Dresponder <- df$EQ5Dresponder

df$EQ5Dresponder12 <- df$EQ5Dresponder12

df$VASbackresponder <- df$VASbackresponder

df$VASbackresponder12 <- df$VASbackresponder12

df$VASlegresponder <- df$VASlegresponder

df$VASlegresponder12 <- df$VASlegresponder12

df$ODIresponder <- df$ODIresponder

df$ODIresponder12 <- df$ODIresponder12

df$RMDQresponder <- df$RMDQresponder

df$RMDQresponder12 <- df$RMDQresponder12

df$stabledisease <- df$stabledisease

df$workabilitychange <- df$workabilitychange

df$age <- as.numeric(df$age)

df$height <- as.numeric(df$height)

df$weight <- as.numeric(df$weight)

df$testtime1<- as.numeric(df$testtime1)

df$testtime2<- as.numeric(df$testtime2)

df$testtime3<- as.numeric(df$testtime3)

df$BMI <- as.numeric(df$BMI)

df$RMDQ <- as.numeric(df$RMDQ)

df$RMDQ6 <- as.numeric(df$RMDQ6)

df$RMDQ12 <- as.numeric(df$RMDQ12)

df$ODI1 <- as.numeric(df$ODI1)

df$ODI6 <- as.numeric(df$ODI6)

df$ODI12 <- as.numeric(df$ODI12)

df$VASback1 <- as.numeric(df$VASback1)

df$VASback6 <- as.numeric(df$VASback6)

df$VASback12 <- as.numeric(df$VASback12)

df$VASleg1 <- as.numeric(df$VASleg1)

df$VASleg6 <- as.numeric(df$VASleg6)

df$VASleg12 <- as.numeric(df$VASleg12)

df$EQ5DVAS1 <- as.numeric(df$EQ5DVAS1)

df$EQ5DVAS6 <- as.numeric(df$EQ5DVAS6)

df$EQ5DVAS12 <- as.numeric(df$EQ5DVAS12)

df$RMDQchange <- as.numeric(df$RMDQchange)

df$RMDQchange6 <- as.numeric(df$RMDQchange6)

df$EQ5DVASchange <- as.numeric(df$EQ5DVASchange)

df$EQ5DVASchange6 <- as.numeric(df$EQ5DVASchange6)

df$VASbackchange <- as.numeric(df$VASbackchange)

df$VASbackchang6 <- as.numeric(df$VASbackchange6)

df$VASlegchange <- as.numeric(df$VASlegchange)

df$VASlegchange6 <- as.numeric(df$VASlegchange6)

df$ODIchange<- as.numeric(df$ODIchange)

df$ODIchange6<- as.numeric(df$ODIchange6)

df$testtimechange <- as.numeric(df$testtimechange)

df$testtimechange6 <- as.numeric(df$testtimechange6)

#Group Comparison

mean(df$age, na.rm = T)

sd(df$age, na.rm = T)

#Tables

table(df$workability12)

table(df$workability12, df$ofi1)

#ChiSquare with Yates correction

chisq.test(df$mood1, df$ofi1, correct = T)

#Mann Whitney test

wilcox.test(as.numeric(df$ODI12)~df$ofi1, correct=FALSE, exact=FALSE)

#Kruskal Wallis test

kruskal.test(mood12 ~ ofi1, data = df)

#Comparison of 2 related categorical variables

#McNemar Bowker Test

install.packages ("stats")

myTable <- table(df$mood1,df$mood12)

mcnemar.test(myTable)

#Ordinal Linear Regression

require(MASS)

m <- polr(mood12 ~ ofi1 + mood1, data = df, Hess = TRUE)

summary(m)

m <- polr(workability12 ~ ofi1 + workability1, data = df, Hess = TRUE)

summary(m)

(ctable <- coef(summary(m)))

p <- pnorm(abs(ctable[, "t value"]), lower.tail = FALSE) * 2

(ctable <- cbind (ctable, "p value" = p))

ci <- confint(m)
