# Supplementary material for: Predictive value of the five-repetition sit-to-stand test for outcomes after surgery for lumbar disc herniation: prospective study
Source: Springer Nature journal article supplement (doi:10.1007/s00586-023-08046-z), 2023-11-22
Supplement: MOESM2 [file 26344304]

**Supplementary Table 1.** Basic demographic data for patients with lumbar disc herniation based on pre-operative OFI BSS.

Continuous variables are presented as mean ± standard deviation and categorical variables as percentages (%)

| Characteristics | | All participants  (n=103) | No OFI  (n=50) | Mild OFI  (n=21) | Moderate OFI  (n=18) | Severe OFI  (n=14) | p-value |
| --- | --- | --- | --- | --- | --- | --- | --- |
| Age | | 53.2±14.35 | 52.7±13.7 | 53.9±16.9 | 50.9±15.1 | 56.1±12.3 | 0.805 |
| Gender | |  |  |  |  |  |  |
|  | Female | 50(48.5) | 21(42) | 12(57.1) | 13(72.2) | 4(28.6) | 0.051 |
|  | Male | 53(51.5) | 29(58.0) | 9(42.9) | 5(17.8) | 10(71.4) |  |
| BMI (kg/m2) | | 27.1±4.0 | 27.0±4.3 | 25.8±3.9 | 27.9±3.5 | 28.0±3.4 | 0.312 |
| Height (cm) | | 176.5±10.4 | 176.6±10.8 | 173.7±9.2 | 174.2±8.5 | 183.6±11.0 | 0.038 |
| Weight (kg) | | 84.7±16.3 | 84.7±16.7 | 77.9±12.8 | 84.6±11.7 | 95.4±20.2 | 0.044 |
| Smoking status | |  |  |  |  |  |  |
|  | Active smoker | 20(19.4) | 8(16.0) | 9(42.9) | 5(27.0) | 6(42.8) |  |
|  | Ceased smoking | 36(35.0) | 15(30.0) | 9(42.9) | 6(33.3) | 6(42.8) | 0.286 |
|  | Never smoked | 47(45.6) | 27(54.0) | 3(14.2) | 7(38.9) | 2(14.4) |  |
| Site of surgery | |  |  |  |  |  |  |
|  | Left | 34(33.0) | 16(32.0) | 5(23.8) | 7(38.9) | 6(42.8) |  |
|  | Right | 27(26.2) | 9(18.0) | 8(38.1) | 6(33.3) | 4(28.6) | 0.392 |
|  | Bilateral | 42(40.8) | 25(50.0) | 8(38.1) | 5(27.8) | 4(28.6) |  |
| Index level | |  |  |  |  |  |  |
|  | L2-3 | 4(3.9) | 1(2.0) | 1(4.8) | 2(11.1) | - |  |
|  | L2-3 & L3-4 | 3(2.9) | 1(2.0) | 1(4.8) | 1(5.6) | - |  |
|  | L3-4 | 10(9.7) | 5(10.0) | 3(14.1) | 2(11.1) | - | 0.826 |
|  | L3-4 & L4-5 | 7(6.8) | 5(10.0) | 1(4.8) | - | 1(7.1) |  |
|  | L4-5 | 41(39.8) | 19(38.0) | 9(42.9) | 7(38.9) | 6(42.9) |  |
|  | L5-S1 | 38(36.9) | 19(38.0) | 6(28.6) | 6(33.3) | 7(50.0) |  |
| Prior spine surgery | | 17(16.5) | 10(20.0) | 2(0.1) | 1(5.6) | 4(28.6) | 0.238 |
| History of pain | |  |  |  |  |  |  |
|  | 6wks- 3mos | 8(7.8) | 2(4.0) | 4(19.0) | 1(5.6) | 1(7.1) |  |
|  | 3mos- 6mos | 23(22.3) | 12(24.0) | 7(33.3) | 6(33.3) | 5(35.7) | 0.257 |
|  | 6mos- 1yr | 30(29.1) | 9(18.0) | 4(19.0) | 6(33.3) | 4(28.6) |  |
|  | >1yr | 42(40.8) | 27(54.0) | 6(28.7) | 5(27.8) | 4(28.6) |  |
| Analgesic drug use | |  |  |  |  |  |  |
|  | Daily | 77(74.8) | 34(68.0) | 16(76.2) | 16(88.8) | 11(78.5) |  |
|  | Weekly | 11(10.7) | 6(12.0) | 3(14.3) | 1(5.6) | 1(7.1) | 0.657 |
|  | Not regularly | 15(14.5) | 10(20.0) | 2(9.5) | 1(5.6) | 2(14.4) |  |
| Education | |  |  |  |  |  |  |
|  | High-school | 48(46.6) | 24(48.0) | 8(38.1) | 7(38.9) | 9(64.3) |  |
|  | Higher | 53(51.5) | 24(48.0) | 13(61.9) | 11(61.1) | 5(35.7) | 0.519 |
|  | Post-doctoral | 2(1.9) | 2(4) | - | - | - |  |
| Work situation | |  |  |  |  |  |  |
|  | Employed | 58(56.3) | 27(54.0) | 9(42.8) | 12(66.6) | 10(71.4 |  |
|  | Self-employed | 3(2.9) | 2(4.0) | 1(4.8) | - | - | 0.834 |
|  | Retired | 25(24.3) | 12(24.0) | 6(28.6) | 3(16.7) | 4(28.6) |  |
|  | House-worker | 5(4.8) | 3(6.0) | 2(9.5) | - | - |  |
|  | Unfit | 5(4.8) | 2(4.0) | 2(9.5) | 1(5.6) | - |  |
|  | Unemployed | 7(6.9) | 4(8.0) | 1(4.8) | 2(11.1) | - |  |
| Ability to work | |  |  |  |  |  |  |
|  | Full | 22(21.4) | 15(30.0) | 59(23.8) | 1(5.6) | 1(7.1) |  |
|  | Limited | 33(32.0) | 14(28.0) | 7(33.3) | 9(50.0) | 3(21.5) | 0.126 |
|  | Unable | 48(46.6) | 21(42.0) | 9(42.9) | 8(44.4) | 10(71.4) |  |
| EQ5D Anxiety &Depression | |  |  |  |  |  |  |
|  | 1 | 63(61.2) | 37(74) | 12(57.1) | 6(33.3) | 8(57.2) | 0.069 |
|  | 2 | 34(33.0) | 12(24) | 8(38.1) | 9(50.0 | 5(35.7) |  |
|  | 3 | 6(5.8) | 1(2.0) | 1(4.8) | 3(16.7) | 1(7.1) |  |
| 5R-STS Time (seconds) | | 13.5±7.3 | 8.17±1.4 | 12.2±1.8 | 18.4±2.3 | 28.5±2.8 | **<0.001** |
| RMDQ | | 13.9±5.2 | 11.6±4.9 | 14.3±5.0 | 16.9±3.8 | 17.9±3.5 | **<0.001** |
| ODI | | 44.2±17.2 | 37.5±13.8 | 42.6±18.2 | 51.2±14.3 | 61.3±16.1 | **<0.001** |
| VAS Back | | 6.5±2.6 | 5.5±2.8 | 7.3±1.5 | 7.1±2.6 | 7.8±1.8 | **0.005** |
| VAS Leg | | 7.7±1.7 | 7.5±1.7 | 7.5±2.2 | 7.9±1.5 | 8.3±1.3 | 0.502 |
| EQ5D- VAS | | 51.5±18.8 | 58.6±19.5 | 45.0±16.7 | 48.6±8.5 | 39.6±19.6 | **<0.001** |

*BMI, Body Mass Index; BSS, baseline severity stratification; OFI*, *objective functional impairment, RMDQ, Roland Morris Disability Questionnaire; ODI, Oswestry Disability Index; VAS, Visual Analogue Scale*

**Supplementary Table 2.**  Comparison of disease burden and change in scores of patients with lumbar disc herniation at 12-months post-operatively based on pre-operative OFI BSS. Continuous variables are presented as mean ± standard deviation and categorical variables as percentages (%)

| Characteristics | | At 12 months post-operatively | | | | |  |  | Change in score | | | | |  |
| --- | --- | --- | --- | --- | --- | --- | --- | --- | --- | --- | --- | --- | --- | --- |
|  | | All participants  (n=103) | No OFI  (n=50) | Mild OFI  (n=21) | Moderate OFI  (n=18) | Severe OFI  (n=14) | p-value |  | All participants  (n=103) | No OFI  (n=50) | Mild OFI  (n=21) | Moderate OFI  (n=18) | Severe OFI  (n=14) | p-value |
| Ability to work | |  |  |  |  |  |  |  |  |  |  |  |  |  |
|  | Full | 76(73.7) | 37(74.0) | 15(71.4) | 14(77.7) | 10(71.4) |  |  |  |  |  |  |  |  |
|  | Limited | 19(18.4) | 10(20.0) | 4(19.0) | 3(16.7) | 2(14.3) | 0.962 |  | - | - | - | - | - | - |
|  | Unable | 8(7.9) | 3(6.0) | 2(9.6) | 1(5.6) | 2(14.3) |  |  |  |  |  |  |  |  |
| EQ5D Anxiety &Depression | |  |  |  |  |  |  |  |  |  |  |  |  |  |
|  | 1 | 102(99.0) | 50(100.0) | 21(100.0) | 17(94.4) | 14(100.0) | 0.190 |  | - | - | - | - | - | - |
|  | 2 | - | - | - | 1(0.6) | - |  |  |  |  |  |  |  |  |
|  | 3 | 1(1.0) | - | - | - | - |  |  |  |  |  |  |  |  |
| 5R-STS Time (seconds) | | 9.4±3.2 | 7.8±1.8 | 9.9±1.2 | 11.6±4.2 | 11.4±4.8 | **<0.001** |  | -4.2±6.7 | -0.4±1.4 | -2.2±2.1 | -6.7±4.5 | -17.1±5.1 | **<0.001** |
| RMDQ | | 3.7±4.9 | 4.0±5.0 | 3.52±4.5 | 3.4±5.7 | 3.3±4.3 | 0.908 |  | -10.2±6.7 | -7.6±6.9 | -10.8±5.1 | -13.5±5.8 | -14.6±5.5 | **<0.001** |
| ODI | | 6.2±9.3 | 6.3±10.0 | 5.5±4.8 | 6.8±12.8 | 5.9±7.2 | 0.922 |  | -38.0±18.7 | -31.2±14.8 | -37.1±19.3 | -44.3±18.1 | -55.4±18.6 | **<0.001** |
| VAS Back | | 1.0±1.9 | 1.0±1.9 | 0.4±0.7 | 0.8±2.0 | 0.7±1.5 | 0.732 |  | -5.6±3.2 | -4.6±3.3 | -6.9±1.8 | -6.3±3.5 | -7.1±2.4 | **0.003** |
| VAS Leg | | 1.3±1.9 | 1.4±1.8 | 1.0±1.5 | 1.4±2.5 | 1.2±2.0 | 0.641 |  | -6.3±2.5 | -6.0±2.39 | -6.5±2.4 | -6.4±2.9 | -7.1±2.1 | 0.494 |
| EQ5D- VAS | | 82.7±9.6 | 82.3±9.1 | 83.6±9.0 | 80.0±13.1 | 86.8±6.4 | 0.272 |  | 31.3±20.9 | 23.7±21.8 | 38.6±16.5 | 31.4±16.2 | 47.1±17.0 | **<0.001** |

*BSS, Baseline Severity Stratification, BMI, Body Mass Index; OFI*, *objective functional impairment, RMDQ, Roland Morris Disability Questionnaire; ODI, Oswestry Disability Index; VAS, Visual Analogue Scale*

**Supplementary Table 3.**  Comparison of disease burden and change in scores of patients with lumbar disc herniation at 12-months post-operatively based on pre-operative OFI vs no OFI who presented with predominant back pain. Continuous variables are presented as mean ± standard deviation and categorical variables as percentages (%).

| Characteristics | |  | At 12 months post-operatively | | | |  |  | Change in score | | | | |
| --- | --- | --- | --- | --- | --- | --- | --- | --- | --- | --- | --- | --- | --- |
| All participants  (n=18) | No OFI  (n=7) | OFI  (n=11) | p-value | All participants  (n=18) | | No OFI  (n=7) | OFI  (n=11) |  | p-value |
| Ability to work | |  |  |  |  |  |  |  | |  |  |  |  |
|  | Full |  | 10 | 3 | 7 |  |  | - | | - | - |  |  |
|  | Limited |  | 6 | 3 | 3 | 0.688 |  | - | | - | - |  | - |
|  | Unable |  | 2 | 1 | 1 |  |  | - | | - | - |  |  |
| EQ5D Anxiety &Depression | |  |  |  |  |  |  |  | |  |  |  |  |
|  | 1 |  | 18 | 7(100.0) | 11(100.0) |  |  | - | | - | - |  | - |
|  | 2 |  | - | - | - | - |  | - | | - | - |  |  |
|  | 3 |  | - | - | - |  |  | - | | - | - |  |  |
| 5R-STS Time (seconds) | |  | 10.1±4.9 | 7.8±1.2 | 11.6±5.8 | 0.057 |  | -5.8±7.7 | | -1.3±0.8 | -8.6±8.8 |  | **0.026** |
| RMDQ | |  | 2.8±3.3 | 1.4±3.0 | 3.7±3.2 | 0.116 |  | -11.4±4.3 | | -10.3±6.2 | -12.1±2.5 |  | 0.318 |
| ODI | |  | 3.7±4.1 | 2.9±3.8 | 4.3±4.3 | 0.397 |  | -40.4±18.6 | | -26.0±13.5 | -49.5±15.6 |  | **0.008** |
| VAS back pain | |  | 0.2±0.5 | 0.1±0.4 | 0.3±0.6 | 0.780 |  | -7.5±1.6 | | -7.4±1.1 | -7.5±1.9 |  | 0.568 |
| VAS leg pain | |  | 0.8±1.2 | 0.7±0.8 | 0.8±1.4 | 0.615 |  | -5.2±2.6 | | -4.9±2.5 | -5.4±2.8 |  | 0.410 |
| EQ5D VAS | |  | 83.6±6.3 | 83.6±6.3 | 83.6±7.1 | 0.885 |  | 31.1±17.5 | | 23.6±16.5 | 35.9±17.0 |  | 0.126 |

*BSS, Baseline Severity Stratification, BMI, Body Mass Index; OFI*, *objective functional impairment, RMDQ, Roland Morris Disability Questionnaire; ODI, Oswestry Disability Index; VAS, Visual Analogue Scale*

**Supplementary Table 4.**  Comparison of disease burden and change in scores of patients with lumbar disc herniation at 12-months post-operatively based on pre-operative OFI vs no OFI who presented with predominant leg pain. Continuous variables are presented as mean ± standard deviation and categorical variables as percentages (%)

| Characteristics | |  | At 12 months post-operatively | | | |  |  | Change in score | | | | |
| --- | --- | --- | --- | --- | --- | --- | --- | --- | --- | --- | --- | --- | --- |
| All participants  (n=50) | No OFI  (n=31) | OFI  (n=19) | p-value | All participants  (n=50) | | No OFI  (n=31) | OFI  (n=19) |  | p-value |
| Ability to work | |  |  |  |  |  |  |  | |  |  |  |  |
|  | Full |  | 40 | 25 | 15 |  |  | - | | - | - |  |  |
|  | Limited |  | 7 | 5 | 2 | 0.518 |  | - | | - | - |  | - |
|  | Unable |  | 3 | 1 | 2 |  |  | - | | - | - |  |  |
| EQ5D Anxiety &Depression | |  |  |  |  |  |  |  | |  |  |  |  |
|  | 1 |  | 102 | 31 | 18 |  |  | - | | - | - |  | - |
|  | 2 |  | - | - | - | 0.803 |  | - | | - | - |  |  |
|  | 3 |  | 1 | - | 1 |  |  | - | | - | - |  |  |
| 5R-STS Time (seconds) | |  | 9.2±3.3 | 7.8±2.0 | 11.4±3.8 | **<0.001** |  | -3.5±6.6 | | -0.2±1.6 | -9.0±7.9 |  | **<0.001** |
| RMDQ | |  | 4.1±5.2 | 4.5±5.2 | 3.4±5.3 | 0.280 |  | -9.7±7.6 | | -7.0±7.4 | -14.2±5.5 |  | **<0.001** |
| ODI | |  | 7.7±11.9 | 7.2±11.4 | 8.4±13.0 | 0.846 |  | -36.9±17.4 | | -32.3±15.5 | -44.4±18.2 |  | **0.010** |
| VAS back pain | |  | 1.3±2.2 | 1.4±2.3 | 1.3±2.2 | 0.830 |  | -3.7±3.2 | | -2.9±3.1 | -4.9±3.0 |  | **0.026** |
| VAS leg pain | |  | 1.8±2.4 | 1.7±2.2 | 1.9±2.7 | 0.898 |  | -6.2±2.5 | | -6.0±2.5 | -6.6±2.5 |  | 0.419 |
| EQ5D VAS | |  | 80.2±11.4 | 80.5±10.3 | 79.7±13.3 | 0.951 |  | 29.4±20.8 | | 23.5±20.0 | 39.2±18.6 |  | **0.003** |

*BSS, Baseline Severity Stratification, BMI, Body Mass Index; OFI*, *objective functional impairment, RMDQ, Roland Morris Disability Questionnaire; ODI, Oswestry Disability Index; VAS, Visual Analogue Scale*

**Supplementary Table 5.**  Comparison of disease burden and change in scores of patients with lumbar disc herniation at 12-months post-operatively based on pre-operative OFI vs no OFI who presented with equal back and leg pain. Continuous variables are presented as mean ± standard deviation and categorical variables as percentages (%)

| Characteristics | |  | At 12 months post-operatively | | | |  |  | Change in score | | | | |
| --- | --- | --- | --- | --- | --- | --- | --- | --- | --- | --- | --- | --- | --- |
| All participants  (n=35) | No OFI  (n=12) | OFI  (n=23) | p-value | All participants  (n=50) | | No OFI  (n=31) | OFI  (n=19) |  | p-value |
| Ability to work | |  |  |  |  |  |  |  | |  |  |  |  |
|  | Full |  | 26 | 9 | 17 |  |  | - | | - | - |  |  |
|  | Limited |  | 6 | 2 | 4 | 0.998 |  | - | | - | - |  | - |
|  | Unable |  | 3 | 1 | 2 |  |  | - | | - | - |  |  |
| EQ5D Anxiety &Depression | |  |  |  |  |  |  |  | |  |  |  |  |
|  | 1 |  | 35 | 12 | 23 |  |  | - | | - | - |  | - |
|  | 2 |  | - | - | - | - |  | - | | - | - |  |  |
|  | 3 |  | - | - | - |  |  | - | | - | - |  |  |
| 5R-STS Time (seconds) | |  | 9.4±2.0 | 7.9±1.7 | 10.2±1.6 | **<0.001** |  | -4.4±6.2 | | -0.3±1.3 | -6.6±6.7 |  | **<0.001** |
| RMDQ | |  | 3.5±5.2 | 4.0±5.3 | 3.3±5.2 | 0.829 |  | -10.3±6.6 | | -7.8±6.1 | -11.7±6.6 |  | 0.134 |
| ODI | |  | 5.3±6.3 | 6.0±8.3 | 5.0±5.1 | 0.971 |  | -38.3±20.7 | | -31.3±14.2 | -41.9±22.9 |  | 0.117 |
| VAS back pain | |  | 0.3±0.6 | 0.5±0.9 | 0.2±0.4 | 0.398 |  | -7.6±1.5 | | -7.2±1.5 | -7.9±1.5 |  | 0.156 |
| VAS leg pain | |  | 0.9±1.3 | 1.7±0.9 | 0.8±1.4 | 0.097 |  | -7.1±2.0 | | -6.8±1.9 | -7.3±2.1 |  | 0.407 |
| EQ5D VAS | |  | 86.0±7.1 | 86.3±5.7 | 85.9±7.8 | 0.971 |  | 34.0±22.8 | | 24.6±29.7 | 38.9±17.1 |  | 0.036 |

*BSS, Baseline Severity Stratification, BMI, Body Mass Index; OFI*, *objective functional impairment, RMDQ, Roland Morris Disability Questionnaire; ODI, Oswestry Disability Index; VAS, Visual Analogue Scale*

**Supplementary Table 6.**  Comparison of disease burden and change in scores of patients with lumbar disc herniation and no history of spine surgery at 12-months post-operatively based on pre-operative OFI vs no OFI. Continuous variables are presented as mean ± standard deviation and categorical variables as percentages (%)

| Characteristics | |  | At 12 months post-operatively | | | |  |  | Change in score | | | | |
| --- | --- | --- | --- | --- | --- | --- | --- | --- | --- | --- | --- | --- | --- |
| All participants  (n=86) | No OFI  (n=40) | OFI  (n=46) | p-value | All participants  (n=86) | | No OFI  (n=40) | OFI  (n=46) |  | p-value |
| Ability to work | |  |  |  |  |  |  |  | |  |  |  |  |
|  | Full |  | 63 | 29 | 34 |  |  | - | | - | - |  |  |
|  | Limited |  | 15 | 8 | 7 | 0.761 |  | - | | - | - |  | - |
|  | Unable |  | 8 | 3 | 5 |  |  | - | | - | - |  |  |
| EQ5D Anxiety &Depression | |  |  |  |  |  |  |  | |  |  |  |  |
|  | 1 |  | 85 | 40 | 45 | 1 |  | - | | - | - |  | - |
|  | 2 |  | - | - | - |  |  | - | | - | - |  |  |
|  | 3 |  | 1 | - | 1 |  |  | - | | - | - |  |  |
| 5R-STS Time (seconds) | |  | 9.3±2.8 | 7.7±1.6 | 10.7±2.9 | **<0.001** |  | -4.2±6.4 | | -0.5±1.5 | -7.4±7.3 |  | **<0.001** |
| RMDQ | |  | 3.4±4.7 | 3.4±4.4 | 3.4±5.0 | 0.692 |  | -10.4±6.9 | | -7.6±6.9 | -12.9±5.8 |  | **<0.001** |
| ODI | |  | 5.5±7.7 | 4.9±5.5 | 6.1±9.1 | 0.698 |  | -38.1±18.6 | | -31.3±14.7 | -44.1±19.7 |  | **<0.001** |
| VAS back pain | |  | 0.7±1.4 | 0.8±1.4 | 0.6±1.5 | 0.404 |  | -5.7±3.1 | | -4.4±3.2 | -6.7±2.7 |  | **<0.001** |
| VAS leg pain | |  | 1.3±1.9 | 1.2±1.7 | 1.3±2.1 | 0.655 |  | -6.5±2.4 | | -6.4±2.0 | -6.6±2.6 |  | 0.397 |
| EQ5D VAS | |  | 82.7±9.4 | 82.9±7.8 | 82.6±10.6 | 0.793 |  | 31.3±20.1 | | 23.7±20.0 | 37.9±17.9 |  | **<0.001** |

*BSS, Baseline Severity Stratification, BMI, Body Mass Index; OFI*, *objective functional impairment, RMDQ, Roland Morris Disability Questionnaire; ODI, Oswestry Disability Index; VAS, Visual Analogue Scale*

**Supplementary Table 7.**  Comparison of disease burden and change in scores of patients with lumbar disc herniation and a history of spine surgery at 12-months post-operatively based on pre-operative OFI vs no OFI. Continuous variables are presented as mean ± standard deviation and categorical variables as percentages (%)

| Characteristics | |  | At 12 months post-operatively | | | |  |  | Change in score | | | | |
| --- | --- | --- | --- | --- | --- | --- | --- | --- | --- | --- | --- | --- | --- |
| All participants  (n=17) | No OFI  (n=10) | OFI  (n=7) | p-value | All participants  (n=50) | | No OFI  (n=31) | OFI  (n=19) |  | p-value |
| Ability to work | |  |  |  |  |  |  |  | |  |  |  |  |
|  | Full |  | 13 | 8 | 5 |  |  | - | | - | - |  |  |
|  | Limited |  | 4 | 2 | 2 | 1 |  | - | | - | - |  | - |
|  | Unable |  | - | - | - |  |  | - | | - | - |  |  |
| EQ5D Anxiety &Depression | |  |  |  |  |  |  |  | |  |  |  |  |
|  | 1 |  | 17 | 10 | 7 |  |  | - | | - | - |  | - |
|  | 2 |  | - | - | - | - |  | - | | - | - |  |  |
|  | 3 |  | - | - | - |  |  | - | | - | - |  |  |
| 5R-STS Time (seconds) | |  | 10.0±5.0 | 8.3±2.4 | 12.5±6.8 | 0.097 |  | -4.4±8.0 | | 0.1±1.4 | -10.9±9.1 |  | **0.008** |
| RMDQ | |  | 5.3±5.7 | 6.4±6.7 | 3.7±3.5 | 0.483 |  | -9.3±6.2 | | -7.8±7.2 | -11.4±4.2 |  | 0.258 |
| ODI | |  | 9.5±15.0 | 12.0±19.0 | 6.0±5.7 | 0.803 |  | -37.2±19.7 | | -30.8±16.0 | -46.3±22.1 |  | 0.087 |
| VAS back pain | |  | 1.4±2.6 | 1.9±3.2 | 0.6±1.1 | 0.496 |  | -5.8±3.4 | | -5.1±4.0 | -6.7±2.3 |  | 0.300 |
| VAS leg pain | |  | 1.5±2.1 | 2.2±2.4 | 0.6±1.1 | 0.053 |  | -5.6±2.7 | | -4.8±3.3 | -6.9±0.9 |  | 0.136 |
| EQ5D VAS | |  | 82.9±11.3 | 80.0±13.5 | 87.1±5.7 | 0.291 |  | 31.2±25.2 | | 24.0±29.2 | 41.4±14.1 |  | 0.040 |

*BSS, Baseline Severity Stratification, BMI, Body Mass Index; OFI*, *objective functional impairment, RMDQ, Roland Morris Disability Questionnaire; ODI, Oswestry Disability Index; VAS, Visual Analogue Scale*

**Supplementary Table 8.**  Comparison of disease burden and change in scores of patients with lumbar disc herniation at 12-months post-operatively based on pre-operative OFI vs no OFI who presented with chronic pain (>3 months). Continuous variables are presented as mean ± standard deviation and categorical variables as percentages (%)

| Characteristics | |  | At 12 months post-operatively | | | |  |  | Change in score | | | | |
| --- | --- | --- | --- | --- | --- | --- | --- | --- | --- | --- | --- | --- | --- |
| All participants  (n=95) | No OFI  (n=48) | OFI  (n=47) | p-value | All participants  (n=50) | | No OFI  (n=31) | OFI  (n=19) |  | p-value |
| Ability to work | |  |  |  |  |  |  |  | |  |  |  |  |
|  | Full |  | 70 | 36 | 34 |  |  | - | | - | - |  |  |
|  | Limited |  | 17 | 9 | 8 | 0.739 |  | - | | - | - |  | - |
|  | Unable |  | 8 | 3 | 5 |  |  | - | | - | - |  |  |
| EQ5D Anxiety &Depression | |  |  |  |  |  |  |  | |  |  |  |  |
|  | 1 |  | 94 | 48 | 46 |  |  | - | | - | - |  | - |
|  | 2 |  | - | - | - | 0.992 |  | - | | - | - |  |  |
|  | 3 |  | 1 | - | 1 |  |  | - | | - | - |  |  |
| 5R-STS Time (seconds) | |  | 9.5±9.6 | 7.9±1.7 | 11.0±3.8 | **<0.001** |  | -4.3±6.9 | | -0.3±1.5 | -8.3±7.9 |  | **<0.001** |
| RMDQ | |  | 3.7±5.0 | 4.1±5.1 | 3.3±4.9 | 0.377 |  | -9.9±6.7 | | -7.2±6.8 | -12.7±5.5 |  | **<0.001** |
| ODI | |  | 6.4±9.6 | 6.6±10.1 | 6.3±9.2 | 0.979 |  | -36.8±18.3 | | -30.3±14.1 | -43.6±19.8 |  | **<0.001** |
| VAS back pain | |  | 0.8±1.7 | 1.0±1.9 | 0.6±1.5 | 0.278 |  | -5.6±3.2 | | -4.6±3.3 | -6.6±2.7 |  | **<0.001** |
| VAS leg pain | |  | 1.3±2.0 | 1.4±1.9 | 1.3±1.5 | 0.332 |  | -6.3±2.4 | | -6.0±2.4 | -6.7±2.3 |  | 0.181 |
| EQ5D VAS | |  | 82.8±9.7 | 82.4±9.2 | 83.3±10.2 | 0.467 |  | 31.5±21.1 | | 23.6±22.2 | 39.7±16.4 |  | **<0.001** |

*BSS, Baseline Severity Stratification, BMI, Body Mass Index; OFI*, *objective functional impairment, RMDQ, Roland Morris Disability Questionnaire; ODI, Oswestry Disability Index; VAS, Visual Analogue Scale*
